# THE AMERICAN JOURNAL OF PSYCHIATRY

---

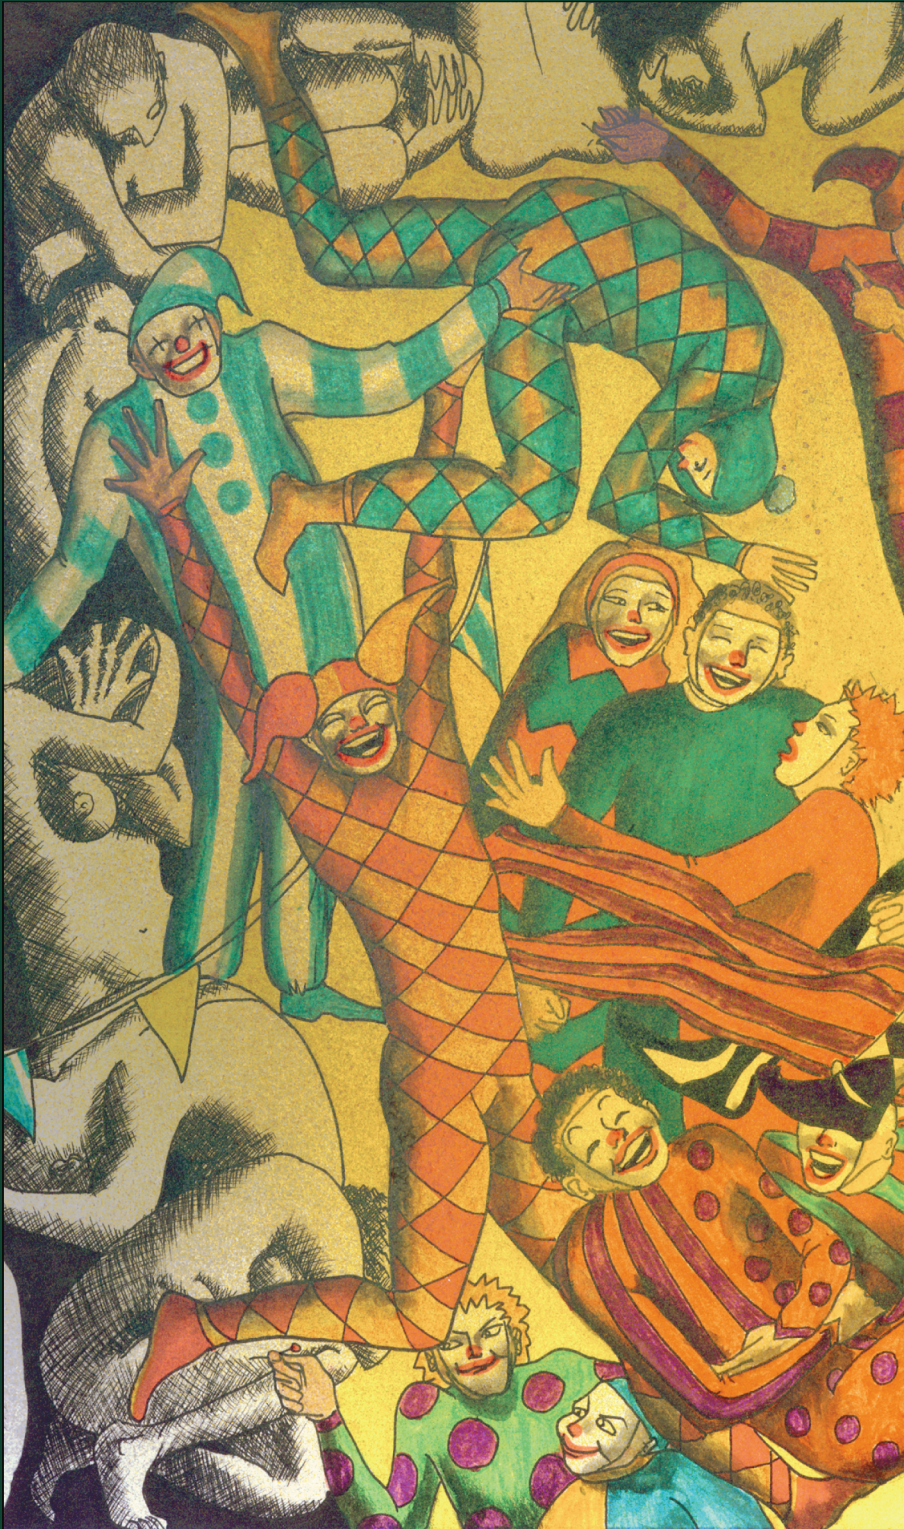

A Comparison of Mirtazapine and Nortriptyline Following Two Consecutive Failed Medication Treatments for Depressed Outpatients: A STAR\*D Report  
Maurizio Fava, et al. 1161

Descriptive and Longitudinal Observations on the Relationship of Borderline Personality Disorder and Bipolar Disorder  
John G. Gunderson, et al. 1173

Changing Profiles of Service Sectors Used for Mental Health Care in the United States  
Philip S. Wang, et al. 1187

Prevalence of the Metabolic Syndrome Among Patients Receiving Clozapine  
J. Steven Lamberti, et al. 1273

July 2006

Volume 163 • Number 7

---

Official Journal of the  
AMERICAN PSYCHIATRIC ASSOCIATION

---

[ajp.psychiatryonline.org](http://ajp.psychiatryonline.org)
