# THE AMERICAN JOURNAL OF PSYCHIATRY

## EDITOR-IN-CHIEF

Robert Freedman, M.D.

## DEPUTY EDITORS

David A. Lewis, M.D.

Robert Michels, M.D.

Daniel S. Pine, M.D.

Susan K. Schultz, M.D.

Carol A. Tamminga, M.D.

## EDITORIAL STAFF

### Editorial Director

Sandra L. Patterson

### Editorial Manager

Michael D. Roy

### Senior Editors

John J. Guardiano, Ph.D.  
Leannah M. Harding, E.L.S.  
Jane Weaver, E.L.S.

### Assistant Editor

Angela Moore

### Production Editor

Julie C. Blair

### Graphic Designer

Jason Glance

### Peer Review Administrator

Molly Douglas

### Editorial Assistants

Lisa Devine  
Astewaye Yigzaw

### Assistants to the Editors

Lois Campbell  
Aniko Evans  
Rachel Hogg  
Russell A. Scholl

## ASSOCIATE EDITORS

Francine M. Benes, M.D., Ph.D.

Wade H. Berrettini, M.D., Ph.D.

Kathleen T. Brady, M.D., Ph.D.

David P. Brent, M.D.

Cameron S. Carter, M.D.

J. Raymond DePaulo, Jr., M.D.

Leon Eisenberg, M.D.

Glen O. Gabbard, M.D.

Howard H. Goldman,  
M.D., Ph.D.

Jeffrey A. Lieberman, M.D.

Robert C. Malenka, M.D., Ph.D.

Maria A. Oquendo, M.D.

Barbara L. Parry, M.D.

Larry J. Siever, M.D.

Myrna M. Weissman, Ph.D.

## EDITORS EMERITI

Nancy C. Andreasen,  
M.D., Ph.D.

John C. Nemiah, M.D.

## FORMER EDITORS

Amariah Brigham, M.D.  
1844-1849

T. Romeyn Beck, M.D.  
1849-1854

John P. Gray, M.D.  
1854-1886

G. Alder Blumer, M.D.  
1886-1894

Richard Dewey, M.D.  
1894-1897

Henry M. Hurd, M.D.  
1897-1904

Edward N. Brush, M.D.  
1904-1931

Clarence B. Farrar, M.D.  
1931-1965

Francis J. Braceland, M.D.  
1965-1978

The American Journal of Psychiatry is online at [ajp.psychiatryonline.org](http://ajp.psychiatryonline.org)

# THE AMERICAN PSYCHIATRIC ASSOCIATION

1000 Wilson Blvd., Suite 1825, Arlington, VA 22209-3901  
(888) 357-7924 (toll-free inside the U.S. and Canada) / (703) 907-7300  
web site: [www.psych.org](http://www.psych.org) / e-mail: [apa@psych.org](mailto:apa@psych.org)

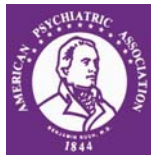

## OFFICERS 2005–2006

|                            |                                |
|----------------------------|--------------------------------|
| <b>President</b>           | Pedro Ruiz, M.D.               |
| <b>President-Elect</b>     | Carolyn B. Robinowitz, M.D.    |
| <b>Vice-President</b>      | Nada L. Stotland, M.D., M.P.H. |
| <b>Secretary-Treasurer</b> | Donna M. Norris, M.D.          |

## ASSEMBLY

|                      |                           |
|----------------------|---------------------------|
| <b>Speaker</b>       | Michael Blumenfield, M.D. |
| <b>Speaker-Elect</b> | Jeffrey Akaka, M.D.       |
| <b>Recorder</b>      | Ronald M. Burd, M.D.      |

## MEDICAL DIRECTOR'S OFFICE

|                                                                               |                                   |
|-------------------------------------------------------------------------------|-----------------------------------|
| <b>Medical Director</b>                                                       | James Scully, M.D.                |
| <b>Chief Executive Officer,<br/>American Psychiatric<br/>Publishing, Inc.</b> | Ronald E. McMillen                |
| <b>Executive Director,<br/>APIRE<br/>Division of Research</b>                 | Darrel A. Regier, M.D.,<br>M.P.H. |

## BOARD OF TRUSTEES

|                                    |                                     |
|------------------------------------|-------------------------------------|
| Renee L. Binder, M.D.              | Roger Peele, M.D.                   |
| Thomas K. Ciesla, M.D.             | Lysiane A. Ribeiro, M.D.,<br>M.P.H. |
| Mary Helen Davis, M.D.             | Anne Marie T. Sullivan, M.D.        |
| Abigail L. Donovan, M.D.           | Amy M. Ursano, M.D.                 |
| David Fassler, M.D.                | Sidney H. Weissman, M.D.            |
| Jeffrey L. Geller, M.D.,<br>M.P.H. | William M. Womack, M.D.             |

## AMERICAN PSYCHIATRIC PUBLISHING, INC.

### BOARD OF DIRECTORS 2005-2006

|                            |                                         |
|----------------------------|-----------------------------------------|
| <b>President and Chair</b> | Thomas N. Wise, M.D.                    |
| <b>Secretary</b>           | Glen O. Gabbard, M.D.                   |
| <b>Treasurer</b>           | Nada L. Stotland, M.D.,<br>M.P.H.       |
| Francine Cournos, M.D.     | Alan F. Schatzberg, M.D.                |
| John M. Oldham, M.D.       | Donna E. Stewart, M.D.,<br>F.R.C.P.(C.) |
| Laura W. Roberts, M.D.     |                                         |

### EX-OFFICIO MEMBERS

|                                                  |                               |
|--------------------------------------------------|-------------------------------|
| <b>APA President</b>                             | Pedro Ruiz, M.D.              |
| <b>APA President Elect</b>                       | Carolyn B. Robinowitz, M.D.   |
| <b>APA Secretary-Treasurer</b>                   | Donna M. Norris, M.D.         |
| <b>APA Medical Director</b>                      | James Scully, M.D.            |
| <b>Editor-in-Chief,<br/>Psychiatric Services</b> | Howard Goldman, M.D.          |
| <b>Editor-in-Chief, Books</b>                    | Robert E. Hales, M.D., M.B.A. |

The American Journal of Psychiatry is online at [ajp.psychiatryonline.org](http://ajp.psychiatryonline.org)

**THE AMERICAN PSYCHIATRIC ASSOCIATION**  
**Chairpersons of Councils, Commissions, Committees, and Task Forces**

**Standing Committees**

*Audit*

Carolyn B. Robinowitz, M.D.

*Finance and Budget*

Jack W. Bonner III, M.D.

*Bylaws*

William C. Wood, M.D.

*Elections*

David Samuel Wahl, M.D.

*Ethics*

Spencer Eth, M.D.

*Executive and Officer Compensation*

Allan Tasman, M.D.

*Investment Oversight*

Maria T. Lymberis, M.D.

*Joint Reference*

Pedro Ruiz, M.D.

*Membership*

Mary K. Marrocco, M.D.

*Nominating*

Michelle B. Riba, M.D.

*Tellers*

**Council on  
Addiction Psychiatry**

Eric C. Strain, M.D.

*Training and Education  
in Addiction Psychiatry*

John A. Renner, Jr., M.D.

*Treatment Services for Patients  
With Addictive Disorders*

Petros Levounis, M.D.

**Council on Advocacy  
and Public Policy**

Jeremy Allan Lazarus, M.D.

*Committee on Government Relations*

Tom Enderby Noyes, M.D.

*Committee on Public Affairs*

C. Deborah Cross, M.D.

*Committee on Advocacy  
and Litigation Funding*

Jeffrey Stuart Janofsky, M.D.

**Council on Aging**

Josepha A. Cheong, M.D.

*Access and Effectiveness of  
Psychiatric Services for the Elderly*

Allan A. Anderson, M.D.

*Ethnic Minority Elderly*

Iqbal Ahmed, M.D.

*Long-Term Care and  
Treatment for the Elderly*

Helen Hisae Kyomen, M.D.

**Council on Children,  
Adolescents, and Their  
Families**

Lois Talbot Flaherty, M.D.

*Developmental Disabilities*

Roxanne Dryden-Edwards,  
M.D.

*Family Violence and Abuse*

Yvonne B. Ferguson, M.D.

*Blanche F. Ittleson Research Award*

Peter S. Jensen, M.D.

*Juvenile Justice Issues*

William Arroyo, M.D.

*Agnes Purcell McGavin Award*

Myron Lowell Belfer, M.D.

*Infancy and Early Childhood*

Irene Chatoor, M.D.

*Mental Health and Schools*

Eugenio M. Rothe, M.D.

**Council on  
Global Psychiatry**

Rodrigo A. Munoz, M.D.

*Misuse and Abuse of Psychiatry*

Alan A. Stone, M.D.

*Psychiatric Dimensions of Disasters*

Anthony T. Ng, M.D.

**Council on Healthcare  
Systems and Financing**

Bruce J. Schwartz, M.D.

*APA/Business Relations*

Norman A. Clemens, M.D.

*Managed Care*

Paul Henry Wick, M.D.

*Medicare Advisory*

Edward Gordon, M.D.

*Private Practice*

Frederick N. Parris, M.D.

*Psychiatry in the Workplace*

Steven E. Pflanz, M.D.

*Public Funding for Psychiatric  
Services*

Selby C. Jacobs, M.D.

*Reimbursement for Psychiatric Care*

Joseph T. English, M.D.

*RBRVS, Codes and Reimbursement*

Chester W. Schmidt, Jr., M.D.

**Council on  
Medical Education  
and Lifelong Learning**

Joan A. Lang, M.D.

*APA/Bristol-Myers Squibb  
Fellowship Selection*

Tana Annette Grady-Weliky,  
M.D.

*APA/SAMHSA Minority Fellowship  
Selection and Advisory*

Evaristo O. Akerele, M.D.

*APA/GlaxoSmithKline  
Fellowship Selection and Program*

Leah Joan Dickstein, M.D.

*APA/Lilly Products  
Resident Research Award*

Carol C. Nadelson, M.D.

*CME/Lifelong Learning*

David Bruce Mallott, M.D.

*Commercial Support*

David M. McDowell, M.D.

*History and Library*

Avram H. Mack, M.D.

*Medical Student Education*

Carl Bruce Greiner, M.D.

*Psychiatric Administration  
and Management*

Sy Ateazaz Saeed, M.D.

*Residents and Fellows*

William C. Wood, M.D.

*Scientific Program*

Marian I. Butterfield, M.D.

*Scientific Program Committee of the  
Institute on Psychiatric Services*

Charles W. Huffine, M.D.

*Vestermark Award*

Patricia Isbell Ordorica,  
M.D.

**Council on Member and  
District Branch Relations**

Michael J. Vergare, M.D.

*Distinguished Service Award*

Steven S. Sharfstein, M.D.

*Newsletter of the Year*

John Chapman Urbaitis,  
M.D.

*District Branch Advisory*

*Physician Health, Illness  
and Impairment*

John Adam Fromson, M.D.

*Ad Hoc Work Group  
on Information Systems*

Robert C. Hsiung, M.D.

**Council on Minority Health  
and Health Disparities**

Francis G. Lu, M.D.

*American Indian, Alaska Native and  
Native Hawaiian Psychiatrists*

Frank W. Brown, M.D.

*Asian-American Psychiatrists*

Surinder S. Nand, M.D.

*Black Psychiatrists*

Sandra C. Walker, M.D.

*Gay, Lesbian, and Bisexual Issues*

Jack Drescher, M.D.

*Hispanic Psychiatrists*

Ana Elisa Campo, M.D.

*International Medical Graduates*

Sanjay Dube, M.D.

*Religion, Spirituality, and Psychiatry*

John Raymond Peteet, M.D.

*Women*

Melva J. Green, M.D.

**Council on  
Psychiatry And Law**

Paul S. Appelbaum, M.D.

*Confidentiality*

Jerome Howard Rogoff,  
M.D.

*Judicial Action*

Jeffrey L. Metzner, M.D.

*Manfred S. Guttmacher Award*

Michael A. Norko, M.D.

*Isaac Ray Award*

J. Richard Ciccone, M.D.

**Council on Psychosomatic  
Medicine**

Philip R. Muskin, M.D.

**Council on Quality Care**

John M. Oldham, M.D.

*AIDS*

Francine Cournos, M.D.

*Executive Committee  
for Practice Guidelines*

John S. McIntyre, M.D.

*Psychotherapy by Psychiatrists*

Eric Martin Plakun, M.D.

*Quality Indicators*

Richard C. Herman, M.D.

*Standards and Survey Procedures*

Steven I. Altchuler, M.D.,  
Ph.D.

*Steering Committee on Practice  
Guidelines*

John S. McIntyre, M.D.

*Patient Safety*

Alfred Herzog, M.D.

**Council on Research**

David J. Kupfer, M.D.

*Electroconvulsive and Other  
Electromagnetic Therapies*

Sarah H. Lisanby, M.D.

*Health Services Research*

Wayne Jay Katon, M.D.

*Prevention of Mental Disorders and  
Promotion of Mental Health*

William Rigby Beardslee,  
M.D.

David Reiss, M.D. (co-chairs)

*Psychiatric Diagnosis  
and Assessment*

Katharine Phillips, M.D.

*Research Awards*

Alan F. Schatzberg, M.D.

*Research on Psychiatric Treatments*

Alan Jay Gelenberg, M.D.

*Research Training*

James H. Meador-Woodruff,  
M.D.

**Council on Social Issues  
and Public Psychiatry**

Jayannathan Srinivasa-  
raghavan, M.D.

*Poverty, Homelessness,  
and Psychiatric Disorders*

Jeffrey Gress Stovall, M.D.

*Psychiatric Services  
Achievement Awards*

Jacqueline Maus Feldman,  
M.D.

*Jails and Prisons*

Henry C. Weinstein, M.D.

**Special Components**

*Editorial Advisory Committee*

Michael F. Myers, M.D.
